# Supplementary material for: Fire-derived organic carbon in soil turns over on a centennial scale
Source: Copernicus journal article supplement (doi:10.5194/bg-9-2847-2012), 2012-08-01
Supplement: Supplementary file 1 [file bg-9-2847-2012-supplement.pdf]

## Supplementary material

### Fire-derived organic carbon turnover in soils on a centennial scale

*Nimisha Singh<sup>\*1</sup>, Samuel Abiven<sup>1</sup>, Margaret S.Torn<sup>2</sup> and Michael W.I. Schmidt<sup>1</sup>*

<sup>1</sup> *University of Zurich, Department of Geography, Winterthurerstrasse 190, Zürich 8057, Switzerland*

<sup>2</sup> *Lawrence Berkeley National Laboratory, Berkeley, CA 94720, USA*

## Methodology

1. Average turnover time: We calculated turnover times based on two data point for each study, the initial stock of PyC and final PyC remaining at the end of the experiment, using Eq. (1). Most studies had only these two data points and intermediate points that were reported in few studies (Hamer et al., 2004; Brodowski, 2005; Kuzyakov et al., 2009) were not included for consistency. The turnover time for compiled data set was then estimated by averaging individual turnover times. We observed that turnover time for PyC ranges from <1 to 750 years and average value of 88 y (Supplementary Figure 2).

$$C_t = C_0 e^{-kt} \quad (1)$$

where  $C_t$  is the remaining stock after time  $t$  (y),  $C_0$  is the initial stock of PyC ( $t=0$ ),  $k$  is the decay rate ( $y^{-1}$ ) and turnover time  $\tau$  (y) =  $1/k$ .

2. For model fit turnover time: The compiled data set ( $n = 54$ ) was used to generate time series decrease in stock of PyC (with initial stock at time  $t = 0$  being 100 % and the last point of each study correspond to remaining stock at time  $t$  in the time series) and two models used in this study were fitted to it using non linear regression.

a) One-pool model was fitted using constrained non-linear regression using chi-square minimization in IBM SPSS statistics software package for Mac.

b) Two-pool model was fit to the compiled data set using constrained non-linear parameter estimation procedures in IBM SPSS statistics software package for Mac. The curve fitting values were iterative and required initial starting values. To avoid errors due to convergence to local minima of residual sum of squares (RSS), we adopted convergence criteria used by Updegraff (Updegraff et al., 1995), where final parameter estimates were accepted only if equations converged to the same values given starting values up to 50% above and below them. The explained variance for two-pool model is given in Supplement Table 3.

### **Statistical analysis**

Non-parametric test for comparison between factors were carried using Wilcoxon rank sum test. A three way ANOVA was done on the data set using R software to test the interaction between the variables (Supplement Table 4). Therefore, the imbalanced design of the grouped data (Supplement Table 5) does not introduce any significant error in the interpretation.

46 **Supplement Table 1:** Studies that calculated the mean residence time (and/or half life) of PyC using modelling approach. Most  
 47 studies assume two-pool model approach with a fast mineralizable pool and a slow mineralizable pool.  
 48

| References                               | Duration of experiment | Type of experiment | Type of char                                                            | Model used to predict MRT                                                                                                                                                                                          | Parameters                                                                                                                                                                                                            | Assumptions                                                                                                                                     | MRT calculated                                                    |
|------------------------------------------|------------------------|--------------------|-------------------------------------------------------------------------|--------------------------------------------------------------------------------------------------------------------------------------------------------------------------------------------------------------------|-----------------------------------------------------------------------------------------------------------------------------------------------------------------------------------------------------------------------|-------------------------------------------------------------------------------------------------------------------------------------------------|-------------------------------------------------------------------|
| (Baldock and Smerni 2002)                | 120 days               | Incubation         | Sap wood, <i>Pinus resinosa</i> (charred at <200° and 200-350° C)       | No model used                                                                                                                                                                                                      |                                                                                                                                                                                                                       |                                                                                                                                                 | Not calculated                                                    |
| (Hamer et al., 2004)(Hamer et al., 2004) | 60 days                | Incubation         | Maize (at 350° C) Rye (at 350°) and wood at (at 800° C)                 | <b>Two-pool decay model</b>                                                                                                                                                                                        | 1. Finely ground PyC material<br>2. Water holding capacity (WHC) was adjusted to 60%<br>3. Samples were incubated at 60°C.<br>4. pH value of maize/sand, rye/sand and wood/sand were 8.0, 6.7, and 6.5, respectively. | Twice as much PyC was mineralized in first 26 days compared to next 30 days suggested, one fast degradable pool and other slow degradable pool. | 39 years for charred straw residues and 76 years for charred wood |
| (Brodowski, 2005)                        | 2 years                | Incubation         | <i>Zea mays</i> (maize) and <i>Secale cereale</i> (rye straw) at 350° C | <b>One-pool decay model</b><br>$X_t = X_e + (100 - X_e) \exp(-kt)$<br>where $X_t$ is PyC concentration at incubation time $t$ , $X_e$ calculated end PyC concentration, $k$ is rate constant( $\text{year}^{-1}$ ) | 1. Finely ground PyC<br>2. WHC = 70% 3. incubated at 20°C in dark                                                                                                                                                     | All PyC is degradable, $X_t = 100 \exp(-kt)$                                                                                                    | Turnover time of 8 years                                          |
| (Hammes et al., 2008)                    | 100 years              | Field              | Wildfire in a steppe land cover                                         | <b>One pool, donor controlled model</b>                                                                                                                                                                            | 1. Mean annual temperature (MAT)                                                                                                                                                                                      | 1) PyC is homogeneous with respect to turnover                                                                                                  | Maximum turnover time                                             |

|                                            |                      |            |                                      |                                                                                                                                                                                                                                                                                                                            |                                                                                                                                                                                                                                                                                                                    |                                                                                                                                                                                                                                                  |                                                                                                            |
|--------------------------------------------|----------------------|------------|--------------------------------------|----------------------------------------------------------------------------------------------------------------------------------------------------------------------------------------------------------------------------------------------------------------------------------------------------------------------------|--------------------------------------------------------------------------------------------------------------------------------------------------------------------------------------------------------------------------------------------------------------------------------------------------------------------|--------------------------------------------------------------------------------------------------------------------------------------------------------------------------------------------------------------------------------------------------|------------------------------------------------------------------------------------------------------------|
|                                            |                      |            |                                      | $\tau = -t/[\ln(f-b)/(f-1)]$ <p>where <math>\tau</math> = turnover times(in years); t = time between samplings (years); f+ ratio of modern PyC flux to historic input flux; b = fraction of original PyC stock remaining</p>                                                                                               | <p>between 1989-1998 was 6.6°C while between 1893-1950 was 5.5°C.</p> <p>2. Total annual rainfall between 1989-1998 iwas 507.7 mm and between 1893-1950 was 438.5 mm.</p>                                                                                                                                          | <p>2) loss of PyC from soil is a first order decay process</p> <p>3) after 1900 sampling , PyC inputs decreased in accord with the decrease in regional fire frequency</p>                                                                       | <p>to be between 444-541 years and minimum to be between 212-262 years.</p>                                |
| (Nguyen et al., 2008)(Nguyen et al., 2008) | 100 years            | Field      | Slash and burn of native forest      | <p>Used <b>One pool model</b> with three parameters</p> $f = Y_0 + ae^{-bt}$ $f = Y_0 + a(1-e^{-bt})$ <p>where f = PyC content at time t (year); <math>Y_0</math> = PyC content at time zero; a = constant, b = reaction rate constant</p>                                                                                 | <p>1. MAT = 19°C</p> <p>2. MAP = 2000 mm</p> <p>3. deep dark reddish soil with friable clay and thick humic topsoil with 45-49% clay, 15-25% silt and 26-40% sand.</p> <p>4. PyC size particle ranged from 5 to 90 mm.</p> <p>5. Stocks were calculated based on PyC content and bulk density in the top 0.1 m</p> | <p>1. Erosion losses presumed to be low since flat landscape positions were selected to minimize lateral soil export</p> <p>2. Long term losses by erosion or vertical transport were low since PyC stocks did not decrease beyond 20 years.</p> | <p>8.3 years of MRT (a rate change of 0.12 year<sup>-1</sup> of total PyC)</p>                             |
| (Liang et al., 2008)(Liang et al., 2008)   | 532 days (1.5 years) | Incubation | High-PyC containing Anthrosols soils | <p><b>Two-pool decay model</b></p> $X_t = X_1 (1-e^{-k_1t}) + X_2 (1-e^{-k_2t})$ <p>where <math>X_t</math>=mineralizable C; <math>X_1</math> = size of the stable C pool; <math>k_1</math> and <math>k_2</math> = mineralization rates of the labile and stable pools, respectively; and t = time of incubation (days)</p> | <p>Turnover time of total SOC (calculated as the ratio of soil C and CO<sub>2</sub>-C loss over 532 days at 30°C incubation temperature)</p>                                                                                                                                                                       | <p>Two pool consisting of</p> <p>1) a large stable pool with a slow turnover rate comprising PyC and /or stable SOM</p> <p>2) a smaller and easily mineralizable C pool of higher turnover rate</p>                                              | <p>Turnover time was between 44-52 years in BC rich soils as compared to 9-20 years in adjacent soils.</p> |

|                           |                                                                           |                                            |                                                                                                                                                                                              |                                                                                                                                                                                                                                                                                                                                                                        |                                                                                                                                                                                                          |                                                                                                                                                                               |                                                                                                                               |
|---------------------------|---------------------------------------------------------------------------|--------------------------------------------|----------------------------------------------------------------------------------------------------------------------------------------------------------------------------------------------|------------------------------------------------------------------------------------------------------------------------------------------------------------------------------------------------------------------------------------------------------------------------------------------------------------------------------------------------------------------------|----------------------------------------------------------------------------------------------------------------------------------------------------------------------------------------------------------|-------------------------------------------------------------------------------------------------------------------------------------------------------------------------------|-------------------------------------------------------------------------------------------------------------------------------|
| (Cheng et al., 2008a)     | 130 years                                                                 | Field                                      | Hardwood (chestnut, hickory, oak and sugar maple) produced similarly as wildfire                                                                                                             | Not used                                                                                                                                                                                                                                                                                                                                                               | n/a                                                                                                                                                                                                      | n/a                                                                                                                                                                           | Not calculated                                                                                                                |
| (Lehmann et al., 2008)    | 100 year                                                                  | Modeling approach with different scenarios | Savannah region wildfire PyC                                                                                                                                                                 | Using single exponential function for scenario 4 i.e. both biomass consumption by fire and the formation of PyC is considered and PyC disappears over time. PyC mineralization was calculated with a <b>first order decay</b> to CO <sub>2</sub>                                                                                                                       | 1. Equilibrium conditions were established for PyC and non-PyC pools for an average of each soil set<br>2. MAP= 887 mm and 738 mm, MAT for both is 27°C<br>3. Clay content is 13% and 21 %, respectively | 1.60-90% biomass burned<br>2. Conversion of burnt biomass to PyC to be between 1-4.5%<br>3. Belowground C input from grass vegetation was not altered as a result of burning. | Between 718 to 9259 years<br>Applying MRT of 1300 yr could SOC and PyC modelled equilibrium matched experimental observations |
| (Cheng et al., 2008b)     | 177 days for PyC conataing soil<br><br>50 days for isolated PyC particles | Incubation                                 | PyC samples were collected from the remnants of historic charcoal blast furnances, which were deposited during 1870s. PyC were produced from woods of chestnut, hickory, oak and sugar maple | For PyC, a <b>one pool decay model</b> was used to fit OC mineralization kinetics<br><br>$OC_{cum}(t) = OC_0 (1 - \exp(-kt))$<br><br>where $OC_{cum}(t)$ = cumulative mineralized OC at time t;<br>$OC_0$ = the amount of “potential” mineralizable OC (mg g <sup>-1</sup> PyC-C); k = decomposition rate constant for potential C mineralization (day <sup>-1</sup> ) | 1. WHC = 60%<br>2. Incubated at 30°C<br>3. 130 year old PyC samples collected from soil.                                                                                                                 |                                                                                                                                                                               | Mean half life for potential mineralized OC was around 19 days (varied between 10-31 days)                                    |
| (Cheng and Lehmann, 2009) | 1 year                                                                    | Incubation                                 | Wood logs of white oak and red oak prepared similarly                                                                                                                                        | Not used                                                                                                                                                                                                                                                                                                                                                               | 1. Aerobic incubation<br>2. At temperature, -22°C, 4°C, 30°C and                                                                                                                                         | n/a                                                                                                                                                                           | Not calculated                                                                                                                |

as furnace making charcoal

70°C.  
3. In water medium

|                          |                       |            |                                                                                                                                              |                                                                                                                                                                                                                                                                                                                      |                                                                                                                                         |                                                                                                                                                                                      |                                                                                           |
|--------------------------|-----------------------|------------|----------------------------------------------------------------------------------------------------------------------------------------------|----------------------------------------------------------------------------------------------------------------------------------------------------------------------------------------------------------------------------------------------------------------------------------------------------------------------|-----------------------------------------------------------------------------------------------------------------------------------------|--------------------------------------------------------------------------------------------------------------------------------------------------------------------------------------|-------------------------------------------------------------------------------------------|
| (Hilscher et al., 2009)  | 48 days               | Incubation | Rye grass ( <i>Lolium perenne</i> ),<br>Pine wood ( <i>Pinus sylvestris</i> ) charred 350° C under oxic condition for 1 minute and 4 minutes | <b>Two pool decay model</b>                                                                                                                                                                                                                                                                                          | Controlled aerobic conditions                                                                                                           | Used mean mineralization rate of last 10 days when the mineralization rate showed no decline                                                                                         | 14 and 19 years for charred rye grass residues and upto 56 years for pine wood chars.     |
| (Kuzuyakov et al., 2009) | 1089 days (3.9 years) | Incubation | <sup>14</sup> C labeled <i>Lolium perenne</i> charred for 13 h at 400° C                                                                     | Decomposition of PyC was estimated based on <sup>14</sup> CO <sub>2</sub> efflux and mean <b>decomposition rate was calculated based on loss of PyC</b>                                                                                                                                                              | 1. Soils were incubated at 70% water holding capacity<br>2. Incubated at 20°C<br>3. Two types of soil, one with low amount of organic C | Biological activity of a loamy soil in the field is about 10% of that under optimal conditions based on biological active time approach for loamy soil.                              | Observed MRT = 200 years and based on the assumption of field condition, MRT = 2000 years |
| (Liang et al., 2010)     | 532 days              | Incubation | PyC rich Anthrosols with distinct <sup>13</sup> C isotopic composition using the C4 plant was added to originally C3 dominated soil          | <b>Two-pool decay model</b><br>$X_t = X_1 (1 - e^{-k_1 t}) + X_2 (1 - e^{-k_2 t})$<br>where X <sub>t</sub> =mineralizable C;<br>X <sub>1</sub> = size of the stable C pool; k <sub>1</sub> and k <sub>2</sub> = mineralization rates of the labile and stable pools, respectively; and t = time of incubation (days) |                                                                                                                                         | Two pool consisting of<br>1) a large stable pool with a slow turnover rate comprising PyC and /or stable SOM<br>2) a smaller and easily mineralizable C pool of higher turnover rate | Does not calculate MRT for PyC                                                            |
| (Major et al., 2010)     | 2 years               | Field      | Mango tree                                                                                                                                   | <b>Two-pool decay model</b>                                                                                                                                                                                                                                                                                          | 1. at 26°C mean annual                                                                                                                  |                                                                                                                                                                                      | MRT of 600                                                                                |

|                                    |           |            |                                                                                                                                                                                                                                                                                                                                                              |                                                                                                                                                                                                                                                 |                                                                                                                                                                                                                                      |                                                                                                                                                                                                                                  |                                                                                                                                                          |
|------------------------------------|-----------|------------|--------------------------------------------------------------------------------------------------------------------------------------------------------------------------------------------------------------------------------------------------------------------------------------------------------------------------------------------------------------|-------------------------------------------------------------------------------------------------------------------------------------------------------------------------------------------------------------------------------------------------|--------------------------------------------------------------------------------------------------------------------------------------------------------------------------------------------------------------------------------------|----------------------------------------------------------------------------------------------------------------------------------------------------------------------------------------------------------------------------------|----------------------------------------------------------------------------------------------------------------------------------------------------------|
|                                    |           |            | ( <i>Mangifera indica</i> L.) charred between 400-600° C                                                                                                                                                                                                                                                                                                     |                                                                                                                                                                                                                                                 | temperature (MAT)<br>2. PyC was ground and < 0.9 mm<br>3. PyC applied at the onset of the dry season and incorporated to soil under native savanna vegetation that was never tilled or cropped. First order decay to CO <sub>2</sub> |                                                                                                                                                                                                                                  | years<br>[When normalized to MRT = 10°C (from 26°C using a Q <sub>10</sub> of 3.4) the resulting MRT = 3264 years]                                       |
| (Zimmerman, 2010)(Zimmerman, 2011) | 1 year    | Incubation | <i>Quercus laurifolia</i> (living wood oak);<br><i>Pinus taeda</i> (pine);<br><i>Juniperus virginiana</i> (cedar);<br><i>Guibourtia demusei</i> (tropical hardwood);<br><i>Tripsacum dactyloides</i> (mixed stems and blades of gamma grass); Sugarcane bagasse charred at 250° C under oxic condition and at 400° C, 524° C and 650° C under N <sub>2</sub> | $C_{lost} = C_0 - C_t = [C_0 e^{b/(m+1)}] \times t^{m+1}$ $C_{1/2} = [(m+1)/2e^b]^{1/(m+1)}$ <p>Where C<sub>0</sub> = initial c amount at time t<sub>0</sub>; C<sub>t</sub> = final C amount at final time t, m is slope and b is intercept</p> | 1) Coarse size fraction (0.25-2 mm)<br>2) Direct relationship was observed between the logarithmically transformed experimental degradation rate (k in units of year <sup>-1</sup> ) and time (in units of years)                    | 1) Biphasic composition consisting of a more labile volatile component of relatively lower C and higher O content and a non-volatile, high C and low O material<br>2) time degradation rate relationship is maintained in future | Half life varies between 260-840 years for 250°C, 370-23,800 years for 400°C, 930-12,800 years for 525°C, 15,600- 2.0 x 10 <sup>7</sup> years for 650°C. |
| (Hilscher and Knicke 2011)         | 28 months | Incubation | Rye grass ( <i>Lolium perenne</i> ),<br>Pine wood ( <i>Pinus sylvestris</i> ) charred                                                                                                                                                                                                                                                                        | <b>Two-pool decay model</b><br>$y = a \cdot e^{(-k_1 \cdot t_1)} + b \cdot e^{(-k_2 \cdot t_2)}$                                                                                                                                                | 1. The water content of the soil samples was adjusted to ca. 60% of the maximum water                                                                                                                                                | 1. linear regression model resulted in lower R <sup>2</sup> in the range 0.42–0.82, which supports the                                                                                                                           | The calculated t <sub>1/2</sub> implies mean residence                                                                                                   |

350° C under oxic condition for 1 minute and 4 minutes

where a = fast decomposable OM pool; b = slowly decomposable OM pool;  $k_1$  and  $k_2$  are turnover constant rate ( $\text{year}^{-1}$ ) at respective time t

holding capacity

2. Incubated at 30 °C in the dark under aerobic conditions.

idea that the PyOM is composed of C pools with different decomposition kinetics.

times between 26 and 31 years for the more stable Pool B.

49

50

51 **Supplement Table 2:** Studies used in the meta-analysis to calculate the turnover time of PyC in terrestrial systems using mono-  
 52 exponential decay model.

| Reference                   | Experimental set up | Matrix | Soil type                                      | Climate/<br>moisture/<br>temperature                                                    | Type of<br>substrate | Pyrolysis<br>temp | Study<br>duration<br>(year) | % of the<br>initial PyC | Individual<br>k ( $\text{year}^{-1}$ ) | Individual MRT,<br>first order decay<br>(year) |
|-----------------------------|---------------------|--------|------------------------------------------------|-----------------------------------------------------------------------------------------|----------------------|-------------------|-----------------------------|-------------------------|----------------------------------------|------------------------------------------------|
| (Baldock and Smernik, 2002) | Incubation          | Sand   | Sand (packed at 1.6 bulk density)              | At 25° C and volumetric water content of 0.29 $\text{cm}^3$ water $\text{cm}^{-3}$ soil | Wood                 | 150°C             | 0.33                        | 87                      | 0.4260                                 | 2.35                                           |
|                             |                     |        |                                                |                                                                                         | Wood                 | >200°C            | 0.33                        | 98                      | 0.0618                                 | 16.18                                          |
| (Hamer et al., 2004)        | Incubation          | Sand   | Sand + 1ml inoculum + 0.5ml nutrient solution  | At 20° C and 60% water holding capacity (WHC)                                           | Maize (Grass)        | 350°C             | 0.16                        | 99.22                   | 0.0479                                 | 20.87                                          |
|                             |                     |        |                                                |                                                                                         | Rye (Grass)          | 350°C             | 0.16                        | 99.28                   | 0.0442                                 | 22.62                                          |
|                             |                     |        |                                                |                                                                                         | Wood                 | 800°C             | 0.16                        | 99.74                   | 0.0159                                 | 62.79                                          |
| (Brodowski, 2005)           | Incubation          | Soil   | Top soil; Ap horizon; 0-25 cm: Haplic Phaeozem | At 20° C and 70% WHC                                                                    | Maize (Grass)        | 350°C             | 2.00                        | 78.73                   | 0.1196                                 | 8.36                                           |
|                             |                     | sand   |                                                |                                                                                         | Maize (Grass)        | 350°C             | 2.00                        | 48.04                   | 0.3666                                 | 2.73                                           |
|                             |                     | Soil   |                                                |                                                                                         | Rye (Grass)          | 350°C             | 2.00                        | 77.91                   | 0.1248                                 | 8.01                                           |
| (Cheng et al., 2008a)       | Field               | Soil   | Soil                                           | Incubated at 30° C and 70° C                                                            | Oak wood             | 450-600°C         | 130.00                      | 77.64                   | 0.0019                                 | 513.66                                         |



|                          |            |      |                                                            |                                                                                      |                           |                  |      |       |        |       |
|--------------------------|------------|------|------------------------------------------------------------|--------------------------------------------------------------------------------------|---------------------------|------------------|------|-------|--------|-------|
| (Bruun et al., 2008)     | Incubation | Soil | Sandy loam                                                 | 25° C                                                                                | 14C labelled              | 225°C            | 0.08 | 98.1  | 0.2494 | 4.01  |
|                          |            |      |                                                            |                                                                                      | Barley root               | 300°C            | 0.08 | 98.6  | 0.1833 | 5.46  |
|                          |            |      |                                                            |                                                                                      | (Hordeum vulgare)         | 375°C            | 0.08 | 91.8  | 1.1123 | 0.90  |
| (Major et al., 2010)     | Field      | Soil | Isohyperthermic kaolinitic Typic Haplustox sandy clay loam | MAT = 26° C<br>MAP = 2200 mm (95% of precipitation falls between April and December) | prunings of mango tree    | 600°C            | 2.00 | 97.8  | 0.0111 | 89.91 |
| (Hilscher et al., 2009)  | Incubation | Soil | Bw horizon of Cambisol under Spruce                        | Incubated at 30° C                                                                   | Lolium perenne (Grass)    | 350°C, 1 minutes | 0.13 | 96.9  | 0.2408 | 4.15  |
|                          |            |      |                                                            |                                                                                      | Lolium perenne (Grass)    | 350°C, 4 minutes | 0.13 | 97.5  | 0.1936 | 5.17  |
|                          |            |      |                                                            |                                                                                      | Pinus sylvestris (Wood)   | 350°C, 1 minutes | 0.13 | 99.34 | 0.0506 | 19.75 |
|                          |            |      |                                                            |                                                                                      | Pinus sylvestris (Wood)   | 350°C, 4 minutes | 0.13 | 99.54 | 0.0353 | 28.36 |
|                          |            |      |                                                            |                                                                                      |                           |                  |      |       |        |       |
| (Kuz'yakov et al., 2009) | Incubation | Soil | Ap horizon of a loamy Haplic Luvisol                       | Incubated at 20° C and 70% WHC                                                       | shoot litter of L perenne | 400°C            | 3.23 | 95.5  | 0.0143 | 70.17 |
| (Zimmerman , 2010)       | Incubation | Sand | Quartz Sand                                                | Incubated in the dark at 32 °C                                                       | Oak (Wood)                | 250°C            | 1.00 | 97.8  | 0.0222 | 44.95 |
|                          |            |      |                                                            |                                                                                      | Pine (wood)               | 250°C            | 1.00 | 97.07 | 0.0297 | 33.63 |
|                          |            |      |                                                            |                                                                                      | Cedar (Wood)              | 250°C            | 1.00 | 98.72 | 0.0129 | 77.62 |
|                          |            |      |                                                            |                                                                                      | Bubinga (wood)            | 250°C            | 1.00 | 98.6  | 0.0141 | 70.93 |
|                          |            |      |                                                            |                                                                                      | Gamma grass               | 250°C            | 1.00 | 98.8  | 0.0121 | 82.83 |
|                          |            |      |                                                            |                                                                                      | Sugar Cane (Grass)        | 250°C            | 1.00 | 98.3  | 0.0171 | 58.32 |
|                          |            |      |                                                            |                                                                                      | Oak (Wood)                | 450°C            | 1.00 | 97.93 | 0.0209 | 47.81 |
|                          |            |      |                                                            |                                                                                      | Pine (wood)               | 450°C            | 1.00 | 98.88 | 0.0113 | 88.78 |
|                          |            |      |                                                            |                                                                                      |                           |                  |      |       |        |       |

|                          |            |      |                                                   |                                        |                        |          |        |       |        |        |
|--------------------------|------------|------|---------------------------------------------------|----------------------------------------|------------------------|----------|--------|-------|--------|--------|
|                          |            |      |                                                   |                                        | Cedar (Wood)           | 450°C    | 1.00   | 98.95 | 0.0106 | 94.74  |
|                          |            |      |                                                   |                                        | Bubinga (Wood)         | 450°C    | 1.00   | 99.11 | 0.0089 | 111.86 |
|                          |            |      |                                                   |                                        | Gamma grass            | 450°C    | 1.00   | 96.98 | 0.0307 | 32.61  |
|                          |            |      |                                                   |                                        | Sugar Cane (Grass)     | 450°C    | 1.00   | 98.17 | 0.0185 | 54.14  |
|                          |            |      |                                                   |                                        | Oak (Wood)             | 525°C    | 1.00   | 99.22 | 0.0078 | 127.70 |
|                          |            |      |                                                   |                                        | Pine (Wood)            | 525°C    | 1.00   | 99.16 | 0.0084 | 118.55 |
|                          |            |      |                                                   |                                        | Cedar (Wood)           | 525°C    | 1.00   | 99.07 | 0.0093 | 107.03 |
|                          |            |      |                                                   |                                        | Gamma grass            | 525°C    | 1.00   | 98.43 | 0.0158 | 63.19  |
|                          |            |      |                                                   |                                        | Sugar Cane (Grass)     | 525°C    | 1.00   | 98.83 | 0.0118 | 84.97  |
|                          |            |      |                                                   |                                        | Oak (Wood)             | 650°C    | 1.00   | 99.15 | 0.0085 | 117.15 |
|                          |            |      |                                                   |                                        | Pine (wood)            | 650°C    | 1.00   | 99.09 | 0.0091 | 109.39 |
|                          |            |      |                                                   |                                        | Cedar (Wood)           | 650°C    | 1.00   | 99.45 | 0.0055 | 181.32 |
|                          |            |      |                                                   |                                        | Bubinga (Wood)         | 650°C    | 1.00   | 99.38 | 0.0062 | 160.79 |
|                          |            |      |                                                   |                                        | Gamma grass            | 650°C    | 1.00   | 98.75 | 0.0126 | 79.50  |
|                          |            |      |                                                   |                                        | Sugar Cane (Grass)     | 650°C    | 1.00   | 99.4  | 0.0060 | 166.17 |
| (Nocentini et al., 2010) | Incubation | Sand | Sand                                              | Incubated at 20° C and 50% WHC         | Pine needles           | 350°C    | 0.08   | 99.53 | 0.0612 | 16.33  |
|                          |            |      |                                                   |                                        | Pine wood              | 350°C    | 0.08   | 99.43 | 0.0743 | 13.46  |
| (Singh et al., 2010)     | Incubation | Soil | top Cambisol soil                                 | Incubated at 25° C and 60% WHC         | Pinus ponderosa (wood) | 450°C    | 0.15   | 99.86 | 0.0091 | 109.81 |
| (Bird et al., 1999)      | Field      | Soil | Coarse sand derived from gneissic granite bedrock | Sub-humid MAT =17.7° C<br>MAP = 630 mm |                        | Wildfire | 100.00 | 50    | 0.0069 | 144.27 |

|                          |            |      |                                |                                                                                                       |                                                   |           |        |       |        |        |
|--------------------------|------------|------|--------------------------------|-------------------------------------------------------------------------------------------------------|---------------------------------------------------|-----------|--------|-------|--------|--------|
| (Hammes et al., 2008)    | Field      | Soil | Chernozem soil                 | MAT = 6.6° C (1989-1998) and 5.3°C (1893-1950); MAP = 507.7 mm (1989-1998) and 438.5 mm (1893-1950)   | Grassland                                         | Wildfire  | 100.00 | 75    | 0.0029 | 347.61 |
| (Nguyen et al., 2008)    | Field      | Soil | Humic Nitosols (FAO/UNESCO)    | Tropical MAT = 19° C MAP = 2000 mm                                                                    | Forest                                            | Wildfire  | 100.00 | 68.52 | 0.0038 | 264.51 |
| (Cheng et al., 2008a)    | Incubation | Soil | Subsurface soil for incubation | Aged charcoal from areas with MAT ranging between 3.9° C to 17.2° C and MAP between 940 mm to 1500 mm | Hardwood (chestnut, hickory, oak and sugar maple) | 450-600°C | 130.00 | 77.7  | 0.0019 | 515.23 |
| (Vasilyeva et al., 2010) | Field      | Soil | Chernozem                      | MAT = +5.5 °C MAP = 600 mm/year Incubated at room                                                     | Grassland                                         | Wildfire  | 55.00  | 93    | 0.0013 | 757.88 |
| (Bruun et al., 2011)     | Incubation | Soil | Sandy Loam (Typic Hapludalf)   | temperature (20-23° C) at constant water content (30%)                                                | Wheat straw                                       | 475       | 0.32   | 88.10 | 0.4022 | 2.49   |
|                          |            |      |                                |                                                                                                       |                                                   | 500       | 0.32   | 92.10 | 0.2613 | 3.83   |
|                          |            |      |                                |                                                                                                       |                                                   | 525       | 0.32   | 94.60 | 0.1762 | 5.67   |
|                          |            |      |                                |                                                                                                       |                                                   | 550       | 0.32   | 96.00 | 0.1296 | 7.72   |
|                          |            |      |                                |                                                                                                       |                                                   | 575       | 0.32   | 96.90 | 0.1000 | 10.00  |

53

54

55

56 **Supplement Table 3: ANOVA for two-pool model**

|                   | Sum of Squares (SS) | df | Mean squares (MS) |
|-------------------|---------------------|----|-------------------|
| Regression        | 473627.92           | 3  | 157875.97         |
| Residual          | 3897.936            | 51 | 76.43             |
| Uncorrected Total | 477525.86           | 54 |                   |
| Corrected Total   | 7010.12             | 53 |                   |

57 R squared = 1 – (Residual Sum of Squares)/(Corrected Sum of Squares) = 0.444

58

59 **Supplement Table 4: Three-way ANOVA for interactions between variables**

|                                           | Df | Sum sq | Mean sq | F value | Pr(>F)        |
|-------------------------------------------|----|--------|---------|---------|---------------|
| Matrix                                    | 2  | 24838  | 12419   | 11.7306 | 0.0001418 *** |
| Temperature of pyrolysis                  | 1  | 35051  | 35051   | 33.1074 | 1.992e-06 *** |
| Initial biomass                           | 2  | 3915   | 1958    | 1.8490  | 0.1733280     |
| Medium: Temperature of pyrolysis          | 1  | 240    | 240     | 0.2263  | 0.6374453     |
| Medium: initial biomass                   | 1  | 34     | 34      | 0.0321  | 0.8588546     |
| Temperature of pyrolysis: initial biomass | 1  | 3440   | 3440    | 3.2488  | 0.0806158     |
| Residuals                                 | 33 | 34937  | 1059    |         |               |

60 Significance codes: 0 '\*\*\*' 0.001 '\*\*' 0.01 '\*' 0.05 '.' 0.1 ' ' 1

61

62 **Supplement Table 5: Number of data point for each factor in the study**

|                                        | Incubation | Field study | Grass PyC | Wood PyC | <400°C pyrolysis temperature | ≥400°C pyrolysis temperature | Sand medium | Soil medium |
|----------------------------------------|------------|-------------|-----------|----------|------------------------------|------------------------------|-------------|-------------|
| <b>Incubation</b>                      | 47         | 0           | 22        | 22       | 22                           | 25                           | 31          | 16          |
| <b>Field study</b>                     | 0          | 6           | 0         | 3        | 0                            | 1                            | 0           | 6           |
| <b>Grass PyC</b>                       | 22         | 0           | 22        | 0        | 10                           | 12                           | 12          | 10          |
| <b>Wood PyC</b>                        | 22         | 0           | 0         | 22       | 9                            | 13                           | 19          | 3           |
| <b>&lt;400°C pyrolysis temperature</b> | 22         | 0           | 10        | 9        | 22                           | 0                            | 13          | 9           |
| <b>≥400°C pyrolysis temperature</b>    | 25         | 1           | 12        | 14       | 0                            | 26                           | 18          | 8           |
| <b>Sand</b>                            | 31         | 0           | 12        | 19       | 13                           | 18                           | 31          | 0           |
| <b>Soil</b>                            | 16         | 6           | 10        | 3        | 9                            | 8                            | 0           | 17          |

63

**Supplement Table 6: Turnover time calculated for grouped factors using one pool model, either average of individual study or model fit using non-linear regression.**

| Grouped factors                               | One pool                                 |                                          |
|-----------------------------------------------|------------------------------------------|------------------------------------------|
|                                               | Average                                  | Model fit                                |
| Incubation study (n = 47)                     | $\tau = 55$ y; Stdv. <sup>1</sup> = 58   | $\tau = 18$ y; RSME <sup>2</sup> = 7.8   |
| Field Study (n = 6)                           | $\tau = 353$ y; Stdv. <sup>1</sup> = 249 | $\tau = 300$ y; RSME <sup>2</sup> = 11.2 |
| Grass PyC (n = 22)                            | $\tau = 37$ y; Stdv. <sup>1</sup> = 41   | $\tau = 12$ y; RSME <sup>2</sup> = 10.1  |
| Wood PyC (n = 22)                             | $\tau = 79$ y; Stdv. <sup>1</sup> = 50   | $\tau = 64$ y; RSME <sup>2</sup> = 2.8   |
| <400°C Pyrolysis temperature (n = 22)         | $\tau = 25$ y; Stdv. <sup>1</sup> = 26   | $\tau = 8$ y; RSME <sup>2</sup> = 8.6    |
| ≥400°C Pyrolysis temperature (n = 26)         | $\tau = 81$ y; Stdv. <sup>1</sup> = 51   | $\tau = 79$ y; RSME <sup>2</sup> = 3.0   |
| Quartz sand (n = 36)                          | $\tau = 73$ y; Stdv. <sup>1</sup> = 48   | $\tau = 20$ y; RSME <sup>2</sup> = 8.5   |
| Soil medium (n = 17, excluding field studies) | $\tau = 23$ y; Stdv. <sup>1</sup> = 33   | $\tau = 19$ y; RSME <sup>2</sup> = 5.6   |

Note: <sup>1</sup> standard deviation; <sup>2</sup> root mean square error

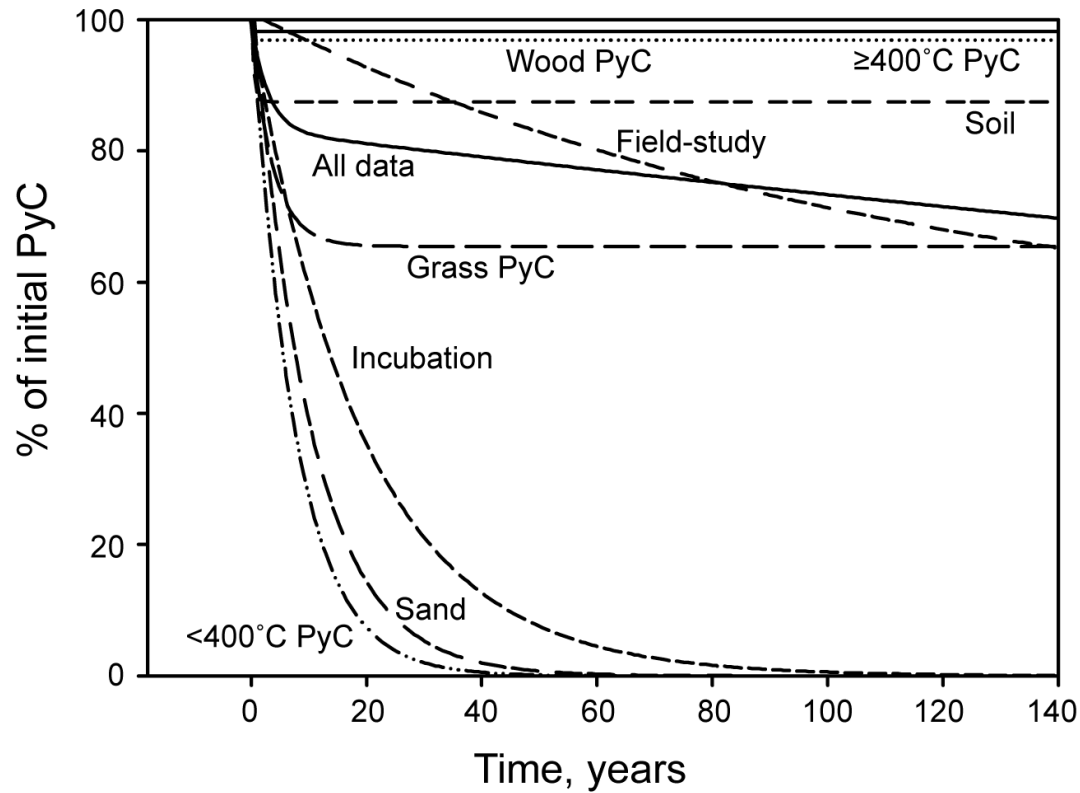

**Supplementary Figure 1:** Two-pool double exponential model on grouped data namely, (a) Incubation studies ( $C_{fast} = 46\%$ ,  $r^2 = 0.16$ ); (b) Field Study ( $C_{fast} = 49.8\%$ ,  $r^2 = 0.51$ ); (c) Grass PyC\* ( $C_{fast} = 46\%$ ,  $r^2 = 0.23$ ); (d) Wood PyC\* ( $C_{fast} = 6\%$ ,  $r^2 = 0.03$ ); (e)  $<400^\circ\text{C}$  PyC\* ( $C_{fast} = 49.8\%$ ,  $r^2 = 0.46$ ); (f)  $\geq 400^\circ\text{C}$  PyC\* ( $C_{fast} = 46\%$ ,  $r^2 = 0.23$ ); (g) Quartz Sand medium\* ( $C_{fast} = 50\%$ ,  $r^2 = 0.20$ ); (h) Soil medium\* ( $C_{fast} = 12\%$ ,  $r^2 = 0.34$ ). (\* denotes only incubation studies included).

## References

- Baldock, J. A., and Smernik, R. J.: Chemical composition and bioavailability of thermally, altered *Pinus resinosa* (Red Pine) wood, *Organic Geochemistry*, 33, 1093-1109, Pii S01466-6380(02)0062-1, 2002.
- Bird, M. I., Moyo, C., Veenendaal, E. M., Lloyd, J., and Frost, P.: Stability of elemental carbon in a savanna soil, *Global Biogeochemical Cycles*, 13, 923-932, 1999.
- Brodowski, S.: Origin, function, and reactivity of black carbon in the arable soil environment, PhD Thesis, Institut für Bodenkunde, Bonn, 183, 2005.
- Bruun, E. W., Hauggaard-Nielsen, H., Ibrahim, N., Egsgaard, H., Ambus, P., Jensen, P. A., and Dam-Johansen, K.: Influence of fast pyrolysis temperature on biochar labile fraction and short-term carbon loss in a loamy soil, *Biomass & Bioenergy*, 35, 1182-1189, Doi 10.1016/J.Biombioe.2010.12.008, 2011.
- Bruun, S., Jensen, E. S., and Jensen, L. S.: Microbial mineralization and assimilation of black carbon: Dependency on degree of thermal alteration, *Organic Geochemistry*, 39, 839-845, Doi 10.1016/J.Orggeochem.2008.04.020, 2008.
- Cheng, C. H., Lehmann, J., and Engelhard, M. H.: Natural oxidation of black carbon in soils: Changes in molecular form and surface charge along a climosequence, *Geochimica Et Cosmochimica Acta*, 72, 1598-1610, Doi 10.1016/J.Gca.2008.01.010, 2008a.
- Cheng, C. H., Lehmann, J., Thies, J. E., and Burton, S. D.: Stability of black carbon in soils across a climatic gradient, *Journal of Geophysical Research-Biogeosciences*, 113, -, ArtId G02027, Doi 10.1029/2007jg000642, 2008b.
- Cheng, C. H., and Lehmann, J.: Ageing of black carbon along a temperature gradient, *Chemosphere*, 75, 1021-1027, 10.1016/j.chemosphere.2009.01.045, 2009.
- Hamer, U., Marschner, B., Brodowski, S., and Amelung, W.: Interactive priming of black carbon and glucose mineralisation, *Organic Geochemistry*, 35, 823-830, Doi 10.1016/J.Orggeochem.2004.03.003, 2004.
- Hammes, K., Torn, M. S., Lapenas, A. G., and Schmidt, M. W. I.: Centennial black carbon turnover observed in a Russian steppe soil, *Biogeosciences*, 5, 1339-1350, 2008.
- Hilscher, A., Heister, K., Siewert, C., and Knicker, H.: Mineralisation and structural changes during the initial phase of microbial degradation of pyrogenic plant residues in soil, *Organic Geochemistry*, 40, 332-342, 10.1016/j.orggeochem.2008.12.004, 2009.
- Hilscher, A., and Knicker, H.: Degradation of grass-derived pyrogenic organic material, transport of the residues within a soil column and distribution in soil organic matter fractions during a 28 month microcosm experiment, *Organic Geochemistry*, 42, 42-54, Doi 10.1016/J.Orggeochem.2010.10.005, 2011.
- Kuzyakov, Y., Subbotina, I., Chen, H. Q., Bogomolova, I., and Xu, X. L.: Black carbon decomposition and incorporation into soil microbial biomass estimated by C-14 labeling, *Soil Biol. Biochem.*, 41, 210-219, 2009.
- Lehmann, J., Skjemstad, J., Sohi, S., Carter, J., Barson, M., Falloon, P., Coleman, K., Woodbury, P., and Krull, E.: Australian climate-carbon cycle feedback reduced by soil black carbon, *Nature Geoscience*, 1, 832-835, 10.1038/ngeo358, 2008.
- Liang, B., Lehmann, J., Solomon, D., Sohi, S., Thies, J. E., Skjemstad, J. O., Luizao, F. J., Engelhard, M. H., Neves, E. G., and Wirrick, S.: Stability of biomass-derived black carbon in soils, *Geochimica Et Cosmochimica Acta*, 72, 6069-6078, 10.1016/j.gca.2008.09.028, 2008.

125 Liang, B. Q., Lehmann, J., Sohi, S. P., Thies, J. E., O'Neill, B., Trujillo, L., Gaunt, J.,  
126 Solomon, D., Grossman, J., Neves, E. G., and Luizao, F. J.: Black carbon affects the  
127 cycling of non-black carbon in soil, *Organic Geochemistry*, 41, 206-213,  
128 [10.1016/j.orggeochem.2009.09.007](https://doi.org/10.1016/j.orggeochem.2009.09.007), 2010.

129 Major, J., Lehmann, J., Rondon, M., and Goodale, C.: Fate of soil-applied black carbon:  
130 downward migration, leaching and soil respiration, *Glob. Change Biol.*, 16, 1366-1379,  
131 [10.1111/j.1365-2486.2009.02044.x](https://doi.org/10.1111/j.1365-2486.2009.02044.x), 2010.

132 Nguyen, B. T., Lehmann, J., Kinyangi, J., Smernik, R., Riha, S. J., and Engelhard, M. H.:  
133 Long-term black carbon dynamics in cultivated soil, *Biogeochemistry*, 89, 295-308, Doi  
134 [10.1007/S10533-008-9220-9](https://doi.org/10.1007/S10533-008-9220-9), 2008.

135 Nocentini, C., Certini, G., Knicker, H., Francioso, O., and Rumpel, C.: Nature and  
136 reactivity of charcoal produced and added to soil during wildfire are particle-size  
137 dependent, *Organic Geochemistry*, 41, 682-689, Doi  
138 [10.1016/J.Orggeochem.2010.03.010](https://doi.org/10.1016/J.Orggeochem.2010.03.010), 2010.

139 Singh, N., S., A., and Schmidt, M. W. I.: Mechanisms of charcoal degradation during its  
140 initial stages of decomposition, *European Geosciences Union Meeting*, Vienna, Austria,  
141 2010,

142 Vasilyeva, N. A., Milanovskiy, E. Y., Abiven, S., Hilf, M., and Schmidt, M. W. I.: Black  
143 carbon quantity and quality unchanged after 55 years of organic matter depletion in a  
144 Chernozem, *SOM 2010 - Organic matter stabilization and ecosystem functions*, 2010.

145 Zimmerman, A. R.: Abiotic and Microbial Oxidation of Laboratory-Produced Black  
146 Carbon (Biochar), *Environmental Science & Technology*, 44, 1295-1301,  
147 [10.1021/es903140c](https://doi.org/10.1021/es903140c), 2010.
